# Supplementary material for: Impaired Recent Verbal Memory in Pornography-Addicted Juvenile Subjects
Source: Hindawi journal article supplement (doi:10.1155/2019/2351638), 2019-08-18
Supplement: f1 [file 2351638.f1.pdf]

**Supplementary Table 1.** Comparison of memory and attention test scores between non-addiction and addiction group, subgrouped by sex

|                 |        | <b>Non-Addiction<br/>(n = 15)</b> | <b>Addiction<br/>(n = 15)</b> | <b>p</b> |
|-----------------|--------|-----------------------------------|-------------------------------|----------|
| <b>Age</b>      | Female | 13.00 ± 1.00                      | 13.83 ± 1.33                  | 0.25     |
|                 | Male   | 13.50 ± 1.07                      | 13.78 ± 1.30                  | 0.62     |
| <b>RAVLT A1</b> | Female | 5.71 ± 2.69                       | 6.17 ± 1.72                   | 0.43     |
|                 | Male   | 7.88 ± 2.59                       | 7.33 ± 2.45                   | 0.66     |
| <b>RAVLT A2</b> | Female | 7.71 ± 0.95                       | 6.83 ± 2.14                   | 0.41     |
|                 | Male   | 10.75 ± 2.66                      | 10.67 ± 2.00                  | 0.73     |
| <b>RAVLT A3</b> | Female | 11.14 ± 3.67                      | 10.50 ± 2.88                  | 0.61     |
|                 | Male   | 11.75 ± 3.37                      | 13.00 ± 2.06                  | 0.46     |
| <b>RAVLT A4</b> | Female | 12.86 ± 1.77                      | 12.00 ± 2.97                  | 0.61     |
|                 | Male   | 13.25 ± 2.19                      | 14.00 ± 1.22                  | 0.61     |
| <b>RAVLT A5</b> | Female | 12.71 ± 2.36                      | 13.67 ± 1.51                  | 0.45     |
|                 | Male   | 13.75 ± 2.19                      | 14.67 ± 0.71                  | 0.40     |
| <b>RAVLT B1</b> | Female | 8.43 ± 2.57                       | 7.17 ± 3.06                   | 0.52     |
|                 | Male   | 7.13 ± 3.23                       | 7.67 ± 2.29                   | 0.56     |
| <b>RAVLT A6</b> | Female | 13.57 ± 1.81                      | 12.33 ± 1.86                  | 0.27     |
|                 | Male   | 13.38 ± 2.26                      | 11.22 ± 2.77                  | 0.12     |
| <b>RAVLT A7</b> | Female | 13.71 ± 1.38                      | 13.17 ± 2.14                  | 0.82     |
|                 | Male   | 13.63 ± 2.13                      | 11.33 ± 2.78                  | 0.07     |
| <b>ROCFT</b>    | Female | 24.50 ± 3.71                      | 24.00 ± 3.74                  | 0.89     |
|                 | Male   | 23.75 ± 5.81                      | 22.72 ± 8.12                  | 1.00     |
| <b>TMT A</b>    | Female | 41.14 ± 12.51                     | 50.00 ± 17.55                 | 0.20     |
|                 | Male   | 39.38 ± 14.45                     | 41.11 ± 11.82                 | 0.85     |
| <b>TMT B</b>    | Female | 108.00 ± 29.98                    | 102.33 ± 84.84                | 0.20     |
|                 | Male   | 80.38 ± 27.05                     | 84.44 ± 19.06                 | 0.19     |

\* statistically significant (p < 0.05)

All values are in mean ± SD, except stated.

MD = Mean Difference (addiction - non-addiction); RAVLT = Rey Auditory Verbal Learning Test; ROCFT = Rey-Osterrieth Complex Figure test
